# Supplementary material for: Penetrance and pleiotropy of polygenic risk scores for schizophrenia in 106,160 patients across four healthcare systems
Source: bioRxiv or medRxiv preprint supplement (doi:10.1101/421164), 2019-03-23
Supplement: Supplementary file [file 421164-1.pdf]

**Supplementary Materials:**  
**Penetrance and pleiotropy of polygenic risk scores for schizophrenia in 90,000 patients across three healthcare systems**

Amanda B Zheutlin, Jessica Dennis, Nicole Restrepo, Peter Straub, Douglas Ruderfer, Victor M Castro, Chia-Yen Chen, H Lester Kirchner, Christopher F Chabris, Lea K Davis, & Jordan W Smoller

Supplementary Methods

Supplementary Tables

Table S1. Schizophrenia PRS PheWAS Results by Site

Table S2. Schizophrenia PRS PheWAS Meta-Analysis Conditioned on Schizophrenia Diagnosis

Table S3. Biobank and Hospital Demographics and Case Prevalence

Supplementary Figures

Figure S1. Case Prevalence by PRS Ventile for Phenome-Wide Significant Phenotypes

Figure S2. Schizophrenia PRS PheWAS Meta-Analysis Conditioned on Schizophrenia Diagnosis

## Supplementary Methods

An overview of the genotype quality control methods employed across sites was described in the main text (Methods: Quality Control of Genetic Data). Details for each site were listed below.

*GHS*: The Geisinger patient samples ( $N = 59,085$ ) were genotyped on the Illumina Human OmniExpress Exome BeadChip (958,497 markers) by the Regeneron Genetics Center. Samples were genotyped in batches of ~20,000-25,000 samples. Individuals and SNPs were filtered based on call rate ( $<1\%$ ), minor allele frequency ( $<1\%$ ), and Hardy Weinberg equilibrium (HWE) ( $p < 10^{-7}$ ). A random individual from pairs of related individuals was removed ( $\text{pihat} > 0.125$ ). Patients with European ancestry determined genetically were retained. Strand alignment, checks, and phasing were performed with SHAPEIT v2; palindromic SNPs were removed during strand alignment. Imputation was performed with IMPUTE2 separately by batch on autosomal chromosomes with the 1000 Genomes Phase 1 reference panel. IMPUTE2 files were converted to hard-call PLINK format using filters for genotype probability ( $>0.9$ ) and INFO score ( $>0.7$ ). Batches were merged after imputation in PLINK v1.90. Principal components to include as ancestry covariates were generated in EIGENSOFT.

*PHS*: 25,540 individuals were genotyped on one of three different Illumina arrays (MEGA, MEGA<sup>EX</sup>, and MEG BeadChip). Individuals and SNPs were excluded from each array for call rate ( $<2\%$ ), sex errors, and heterozygosity ( $|F_{\text{het}}| > 0.2$ ); then all three arrays were merged using only variants present in all three datasets. SNPs that had allele frequencies that differed between chips ( $>1\%$ ) or showed significant array effects ( $p < 10^{-6}$ ) in the merged dataset were excluded. To identify and extract individuals of European-American ancestry, we pruned the initial merged dataset by linkage disequilibrium and randomly removed one individual from pairs with apparent relatedness ( $\text{pihat} > 0.2$ ). We merged this dataset with the 1000 Genomes sample<sup>2</sup> and generated principal components (PCs). 1000 Genomes has labeled individuals within their dataset as belonging to one of five ancestrally distinct super-populations. We used the first four PCs to identify individuals from PHS that clustered with the European 1000 Genomes super-population ( $N = 19,136$ ). Next, we used 1000 Genomes Phase III reference panel to impute the initial merged dataset ( $N_{\text{SNP}} = 1,345,786$ ) with only unrelated European-American individuals ( $N = 19,136$ ). We used Eagle v2.3.5 for prephasing and Minimac3 for imputation. Dosage files were converted to hard-call genotypes with PLINK v1.90 using filters for genotyping probability ( $P > .8$ ), INFO score ( $>.9$ ), and SNP missingness ( $<2\%$ ). After a final round of quality control using filters for violations of HWE ( $p < 10^{-4}$ ) and minor allele frequency ( $<1\%$ ), our dataset included 19,136 European-American patients and 6,237,592 variants.

*VUMC*: A subset of BioVU patients ( $N = 24,262$ ) were genotyped on the Illumina MEGA<sup>EX</sup> platform of more than 2 million markers. Ruderfer and colleagues described the first phase of quality control elsewhere<sup>1</sup>, including filters for SNP and individual call rate ( $<2\%$ ), minor allele frequency ( $<1\%$ ), violations of HWE ( $p < 5 \times 10^{-5}$ ), batch effects ( $p < 5 \times 10^{-5}$ ), heterozygosity ( $|F_{\text{het}}| > 0.2$ ), and relatedness ( $\text{pihat} > 0.2$ ). Ancestry principal components were used to identify individuals of European ancestry, and SHAPEIT / IMPUTE2 were used to pre-phase and impute genotypes according to the 1000 Genomes Phase I reference panel. In the second phase of quality control, we converted dosage data to hard genotype calls and excluded variants with certainty less than 0.9 or  $\text{INFO} < 0.95$ . After these quality control measures, 18,385 individuals remained. In all subsequent analyses, we used genotype batch and the first 10 ancestry principal components calculated by multidimensional scaling in PLINK v1.90 as covariates.

Table S1.  
Schizophrenia PRS PheWAS Results by Site

| Phecode | Description                                    | GHS   |                                |        |          |      | PHS   |                                |       |          |      | VUMC  |                               |       |          |      |
|---------|------------------------------------------------|-------|--------------------------------|--------|----------|------|-------|--------------------------------|-------|----------|------|-------|-------------------------------|-------|----------|------|
|         |                                                | OR    | <i>p</i>                       | Cases  | Controls | Rank | OR    | <i>p</i>                       | Cases | Controls | Rank | OR    | <i>p</i>                      | Cases | Controls | Rank |
| 300     | Anxiety, phobic and dissociative disorders     | 1.095 | <b>5.99 x 10<sup>-16</sup></b> | 16,749 | 33,986   | 2    | 1.205 | <b>2.36 x 10<sup>-15</sup></b> | 3,178 | 11,718   | 1    | 1.045 | 0.0542                        | 2,631 | 14,169   | 74   |
| 300.1   | Anxiety disorder                               | 1.100 | <b>1.32 x 10<sup>-16</sup></b> | 14,848 | 36,096   | 1    | 1.198 | <b>9.03 x 10<sup>-13</sup></b> | 2,640 | 12,400   | 2    | 1.051 | 0.0467                        | 2,114 | 14,817   | 68   |
| 296.1   | Bipolar                                        | 1.179 | <b>2.98 x 10<sup>-8</sup></b>  | 1,573  | 54,343   | 8    | 1.297 | <b>3.27 x 10<sup>-7</sup></b>  | 537   | 15,918   | 6    | 1.248 | <b>2.50 x 10<sup>-5</sup></b> | 419   | 17,739   | 1    |
| 295.1   | Schizophrenia                                  | 1.644 | <b>2.09 x 10<sup>-12</sup></b> | 267    | 55,968   | 3    | 1.657 | <b>1.22 x 10<sup>-5</sup></b>  | 100   | 16,513   | 8    | NA    | NA                            | 67    | 18,254   | NA   |
| 295     | Schizophrenia and other psychotic disorders    | 1.291 | <b>5.60 x 10<sup>-8</sup></b>  | 607    | 54,645   | 9    | 1.434 | <b>1.85 x 10<sup>-7</sup></b>  | 286   | 15,999   | 5    | 1.238 | 4.78 x 10 <sup>-4</sup>       | 304   | 17,611   | 2    |
| 296     | Mood disorders                                 | 1.061 | <b>7.78 x 10<sup>-8</sup></b>  | 17,496 | 34,791   | 10   | 1.158 | <b>5.75 x 10<sup>-11</sup></b> | 3,529 | 11,895   | 3    | 1.055 | 0.0099                        | 3,370 | 13,418   | 20   |
| 316     | Substance addiction and disorders              | 1.181 | <b>5.35 x 10<sup>-9</sup></b>  | 1,702  | 53,445   | 5    | 1.204 | 1.17 x 10 <sup>-4</sup>        | 609   | 15,660   | 11   | 1.167 | 0.0010                        | 532   | 17,461   | 4    |
| 296.2   | Depression                                     | 1.052 | <b>4.53 x 10<sup>-6</sup></b>  | 16,587 | 35,701   | 14   | 1.145 | <b>7.98 x 10<sup>-9</sup></b>  | 3,071 | 12,366   | 4    | 1.048 | 0.0279                        | 3,025 | 13,794   | 40   |
| 318     | Tobacco use disorder                           | 1.070 | <b>2.30 x 10<sup>-8</sup></b>  | 11,910 | 41,219   | 7    | 1.125 | 0.0012                         | 1,110 | 14,760   | 14   | 1.042 | 0.1203                        | 1,763 | 15,394   | 147  |
| 278.11  | Morbid obesity                                 | 0.930 | <b>4.15 x 10<sup>-10</sup></b> | 13,462 | 40,275   | 4    | 0.977 | 0.5728                         | 840   | 15,400   | 542  | 0.943 | 0.0755                        | 1,113 | 16,648   | 94   |
| 300.9   | Posttraumatic stress disorder                  | 1.185 | 0.0021                         | 440    | 55,592   | 45   | 1.287 | 1.03 x 10 <sup>-4</sup>        | 323   | 16,199   | 10   | 1.243 | 0.0021                        | 230   | 18,035   | 6    |
| 296.22  | Major depressive disorder                      | 1.074 | 1.31 x 10 <sup>-4</sup>        | 4,167  | 47,526   | 21   | 1.101 | 0.0063                         | 1,173 | 15,106   | 33   | 1.133 | 0.0010                        | 837   | 17,086   | 3    |
| 317     | Alcohol-related disorders                      | 1.123 | <b>1.48 x 10<sup>-5</sup></b>  | 1,939  | 53,241   | 17   | 1.096 | 0.0427                         | 686   | 15,518   | 83   | 1.136 | 0.0044                        | 587   | 17,421   | 11   |
| 599.3   | Dysuria                                        | 1.083 | <b>2.27 x 10<sup>-6</sup></b>  | 5,488  | 43,661   | 13   | 1.105 | 0.0766                         | 432   | 15,331   | 123  | 1.096 | 0.0219                        | 764   | 16,339   | 31   |
| 300.11  | Generalized anxiety disorder                   | 1.094 | <b>1.30 x 10<sup>-6</sup></b>  | 4,205  | 50,206   | 12   | 1.089 | 0.1445                         | 407   | 15,999   | 190  | 1.146 | 0.0228                        | 325   | 17,760   | 33   |
| 301     | Personality disorders                          | 1.261 | <b>2.53 x 10<sup>-7</sup></b>  | 667    | 55,149   | 11   | 1.14  | 0.1663                         | 151   | 16,435   | 211  | NA    | NA                            | 91    | 18,202   | NA   |
| 798     | Malaise and fatigue                            | 1.038 | 0.0019                         | 13,091 | 31,868   | 43   | 1.1   | <b>2.36 x 10<sup>-5</sup></b>  | 3,685 | 10,604   | 9    | 1.042 | 0.0241                        | 5,257 | 10,123   | 34   |
| 599     | Other symptoms/disorders or the urinary system | 1.049 | <b>2.76 x 10<sup>-5</sup></b>  | 15,429 | 31,937   | 18   | 1.05  | 0.0591                         | 2,430 | 12,621   | 105  | 1.053 | 0.0222                        | 2,735 | 13,605   | 32   |
| 297.1   | Suicidal ideation                              | 1.198 | 0.0036                         | 346    | 55,388   | 51   | 1.466 | <b>7.37 x 10<sup>-6</sup></b>  | 188   | 16,314   | 7    | NA    | NA                            | 98    | 18,127   | NA   |
| 297     | Suicidal ideation or attempt                   | 1.189 | 2.82 x 10 <sup>-4</sup>        | 595    | 54,922   | 25   | 1.139 | 0.0063                         | 618   | 14,973   | 31   | 1.208 | 0.0314                        | 146   | 18,067   | 47   |
| 278.1   | Obesity                                        | 0.943 | <b>1.45 x 10<sup>-8</sup></b>  | 22,597 | 29,077   | 6    | 1.007 | 0.7791                         | 2,833 | 12,827   | 696  | 0.985 | 0.5003                        | 2,546 | 14,694   | 488  |

|        |                                                |       |                               |       |        |    |       |        |       |        |     |       |        |       |        |     |
|--------|------------------------------------------------|-------|-------------------------------|-------|--------|----|-------|--------|-------|--------|-----|-------|--------|-------|--------|-----|
| 300.12 | Agorophobia, social phobia, and panic disorder | 1.133 | <b>9.48 x 10<sup>-6</sup></b> | 1,752 | 53,402 | 15 | 1.154 | 0.0269 | 330   | 16,076 | 59  | 0.998 | 0.9829 | 188   | 17,990 | 883 |
| 317.1  | Alcoholism                                     | 1.114 | 5.93 x 10 <sup>-4</sup>       | 1,387 | 53,812 | 29 | 1.107 | 0.0442 | 542   | 15,693 | 85  | 1.130 | 0.0167 | 444   | 17,587 | 29  |
| 539    | Bariatric surgery                              | 0.918 | 5.24 x 10 <sup>-5</sup>       | 3,238 | 52,699 | 19 | 0.881 | 0.0518 | 324   | 16,243 | 96  | 0.945 | 0.3954 | 256   | 18,024 | 394 |
| 532    | Dysphagia                                      | 1.082 | 2.64 x 10 <sup>-4</sup>       | 3,026 | 49,917 | 24 | 1.072 | 0.0781 | 907   | 15,003 | 127 | 1.047 | 0.1048 | 1,505 | 15,833 | 131 |
| 427.9  | Palpitations                                   | 1.054 | 0.0054                        | 4,028 | 47,923 | 54 | 1.075 | 0.0152 | 1,741 | 13,518 | 42  | 1.057 | 0.0285 | 2,085 | 14,793 | 43  |

Phenotypes were listed in rank order of significance from the schizophrenia PRS PheWAS meta-analysis. Individual effects were listed for each site and those that surpassed the site-specific Bonferroni-corrected significance threshold were bolded (GHS, 1263 phecodes,  $p < 3.96 \times 10^{-5}$ ; PHS, 850 phecodes,  $p < 5.88 \times 10^{-5}$ ; VUMC, 897 phecodes,  $p < 5.57 \times 10^{-5}$ ).

Table S2.  
Schizophrenia PRS PheWAS Meta-Analysis Conditioned on Schizophrenia Diagnosis

| Phecode | Description                                     | Beta   | SE    | OR    | <i>p</i>                       | Total  | Cases  | Controls |
|---------|-------------------------------------------------|--------|-------|-------|--------------------------------|--------|--------|----------|
| 300.1   | Anxiety disorder                                | 0.093  | 1.098 | 0.010 | <b>1.54 x 10<sup>-21</sup></b> | 82,177 | 19,316 | 62,861   |
| 300     | Anxiety, phobic and dissociative disorders      | 0.088  | 1.092 | 0.009 | <b>8.91 x 10<sup>-21</sup></b> | 81,709 | 22,222 | 59,487   |
| 278.11  | Morbid obesity                                  | -0.071 | 0.932 | 0.011 | <b>3.29 x 10<sup>-11</sup></b> | 86,917 | 15,329 | 71,588   |
| 296     | Mood disorders                                  | 0.060  | 1.061 | 0.009 | <b>5.34 x 10<sup>-11</sup></b> | 83,735 | 23,933 | 59,802   |
| 316     | Substance addiction and disorders               | 0.145  | 1.156 | 0.022 | <b>1.09 x 10<sup>-10</sup></b> | 88,611 | 2,735  | 85,876   |
| 296.1   | Bipolar                                         | 0.147  | 1.159 | 0.024 | <b>1.23 x 10<sup>-9</sup></b>  | 89,721 | 2,422  | 87,299   |
| 296.2   | Depression                                      | 0.052  | 1.054 | 0.009 | <b>1.53 x 10<sup>-8</sup></b>  | 83,786 | 22,265 | 61,521   |
| 318     | Tobacco use disorder                            | 0.060  | 1.062 | 0.011 | <b>2.05 x 10<sup>-8</sup></b>  | 85,362 | 14,634 | 70,728   |
| 278.1   | Obesity                                         | -0.047 | 0.954 | 0.009 | <b>9.02 x 10<sup>-8</sup></b>  | 83,790 | 27,765 | 56,025   |
| 300.11  | Generalized anxiety disorder                    | 0.087  | 1.091 | 0.017 | <b>4.19 x 10<sup>-7</sup></b>  | 88,084 | 4,878  | 83,206   |
| 599.3   | Dysuria                                         | 0.074  | 1.077 | 0.015 | <b>9.60 x 10<sup>-7</sup></b>  | 81,261 | 6,617  | 74,644   |
| 539     | Bariatric surgery                               | -0.089 | 0.915 | 0.019 | <b>3.61 x 10<sup>-6</sup></b>  | 89,942 | 3,798  | 86,144   |
| 317     | Alcohol-related disorders                       | 0.096  | 1.100 | 0.021 | <b>5.33 x 10<sup>-6</sup></b>  | 88,588 | 3,103  | 85,485   |
| 599     | Other symptoms/disorders or the urinary system  | 0.043  | 1.044 | 0.010 | <b>9.03 x 10<sup>-6</sup></b>  | 78,034 | 20,338 | 57,696   |
| 798     | Malaise and fatigue                             | 0.041  | 1.042 | 0.009 | <b>9.84 x 10<sup>-6</sup></b>  | 73,928 | 21,595 | 52,333   |
| 250.2   | Type 2 diabetes                                 | -0.040 | 0.960 | 0.009 | <b>1.01 x 10<sup>-5</sup></b>  | 87,355 | 22,411 | 64,944   |
| 250     | Diabetes mellitus                               | -0.040 | 0.961 | 0.009 | <b>1.12 x 10<sup>-5</sup></b>  | 87,202 | 23,009 | 64,193   |
| 300.9   | Posttraumatic stress disorder                   | 0.164  | 1.178 | 0.038 | <b>1.43 x 10<sup>-5</sup></b>  | 89,987 | 922    | 89,065   |
| 300.12  | Agoraphobia, social phobia, and panic disorder  | 0.107  | 1.113 | 0.025 | <b>1.60 x 10<sup>-5</sup></b>  | 88,918 | 2,230  | 86,688   |
| 296.22  | Major depressive disorder                       | 0.067  | 1.069 | 0.016 | <b>1.69 x 10<sup>-5</sup></b>  | 85,113 | 5,998  | 79,115   |
| 427.9   | Palpitations                                    | 0.054  | 1.056 | 0.014 | 6.73 x 10 <sup>-5</sup>        | 83,344 | 7,742  | 75,602   |
| 727.1   | Synovitis and tenosynovitis                     | -0.061 | 0.941 | 0.016 | 1.16 x 10 <sup>-4</sup>        | 84,210 | 5,707  | 78,503   |
| 317.1   | Alcoholism                                      | 0.093  | 1.098 | 0.024 | 1.17 x 10 <sup>-4</sup>        | 88,651 | 2,287  | 86,364   |
| 532     | Dysphagia                                       | 0.061  | 1.062 | 0.016 | 1.65 x 10 <sup>-4</sup>        | 85,418 | 5,301  | 80,117   |
| 278     | Overweight, obesity and other hyperalimentation | -0.032 | 0.969 | 0.009 | 2.43 x 10 <sup>-4</sup>        | 81,497 | 32,366 | 49,131   |

Effects that surpassed the Bonferroni-corrected significance threshold ( $3.7 \times 10^{-5}$ ) were bolded.

Table S3.  
Biobank and Hospital Demographics and Case Prevalence

|                                                       | GHS                   |                           | PHS                   |                           | VUMC                  |                           |
|-------------------------------------------------------|-----------------------|---------------------------|-----------------------|---------------------------|-----------------------|---------------------------|
|                                                       | Biobank<br>N = 56,926 | Hospital<br>N = 1,184,064 | Biobank<br>N = 16,684 | Hospital<br>N = 1,855,688 | Biobank<br>N = 18,358 | Hospital<br>N = 2,354,159 |
| Mean age, years (SD)                                  | 58.6 (17.3)           | 46.0 (21.9)               | 57.7 (16.1)           | 47.4 (19.1)               | 60.7 (17.2)           | 48.6 (23.6)               |
| Females, N (%)                                        | 35,111 (59%)          | 628,592 (53%)             | 9,003 (54%)           | 1,074,789 (58%)           | 9,350 (51%)           | 1,278,720 (54%)           |
| Median EHR length, days                               | 4,811                 | 1,710                     | 3,910                 | 377                       | 3,568                 | 533                       |
| 300: Anxiety, phobic and dissociative disorders       | 16,749 (29%)          | 144,380 (12%)             | 3,178 (19%)           | 163,248 (9%)              | 2,631 (14%)           | 123,134 (5%)              |
| 300.1: Anxiety disorder                               | 14,848 (26%)          | 129,330 (11%)             | 2,640 (16%)           | 132,354 (7%)              | 2,114 (12%)           | 92,584 (4%)               |
| 296.1: Bipolar                                        | 1,573 (3%)            | 16,911 (1%)               | 537 (3%)              | 23,972 (1%)               | 419 (2%)              | 28,826 (1%)               |
| 295.1: Schizophrenia                                  | 267 (1%)              | 4,587 (0%)                | 100 (1%)              | 7,847 (0%)                | 67 (0%)               | 7,799 (0%)                |
| 295: Schizophrenia and other psychotic disorders      | 607 (1%)              | 8,424 (1%)                | 286 (2%)              | 19,733 (1%)               | 304 (2%)              | 21,383 (1%)               |
| 296: Mood disorders                                   | 17,496 (31%)          | 144,519 (12%)             | 3,529 (21%)           | 177,489 (10%)             | 3,370 (18%)           | 135,233 (6%)              |
| 316: Substance addiction and disorders                | 1,702 (3%)            | 12,015 (1%)               | 609 (4%)              | 34,340 (2%)               | 532 (3%)              | 47,186 (2%)               |
| 296.2: Depression                                     | 16,587 (29%)          | 120,139 (10%)             | 3,071 (18%)           | 143,464 (8%)              | 3,025 (16%)           | 111,064 (5%)              |
| 318: Tobacco use disorder                             | 11,910 (21%)          | 91,858 (8%)               | 1,110 (7%)            | 64,813 (4%)               | 1,763 (10%)           | 113,105 (5%)              |
| 278.11: Morbid obesity                                | 13,462 (24%)          | 56,636 (5%)               | 841 (5%)              | 32,165 (2%)               | 1,113 (6%)            | 37,502 (2%)               |
| 300.9: Posttraumatic stress disorder                  | 440 (1%)              | 2,050 (0%)                | 323 (2%)              | 13,728 (1%)               | 230 (1%)              | 16,433 (1%)               |
| 296.22: Major depressive disorder                     | 4,167 (7%)            | 16,419 (1%)               | 1,173 (7%)            | 52,397 (3%)               | 837 (5%)              | 45,794 (2%)               |
| 317: Alcohol-related disorders                        | 1,939 (3%)            | 15,519 (1%)               | 686 (4%)              | 38,169 (2%)               | 587 (3%)              | 41,803 (2%)               |
| 599.3: Dysuria                                        | 5,488 (10%)           | 49,048 (4%)               | 432 (3%)              | 24,256 (1%)               | 764 (4%)              | 55,857 (2%)               |
| 300.11: Generalized anxiety disorder                  | 4,205 (7%)            | 32,541 (3%)               | 407 (2%)              | 16,965 (1%)               | 325 (2%)              | 17,997 (1%)               |
| 301: Personality disorders                            | 667 (1%)              | 3,168 (0%)                | 151 (1%)              | 4,102 (0%)                | 91 (1%)               | 6,059 (0%)                |
| 798: Malaise and fatigue                              | 13,091 (23%)          | 101,495 (9%)              | 3,686 (22%)           | 139,168 (8%)              | 5,257 (29%)           | 199,327 (9%)              |
| 599: Other symptoms / disorders of the urinary system | 15,429 (27%)          | 125,269 (11%)             | 2,430 (15%)           | 103,605 (6%)              | 2,735 (15%)           | 127,729 (5%)              |
| 297.1: Suicidal ideation                              | 346 (1%)              | 1,981 (0%)                | 188 (1%)              | 5,955 (0%)                | 98 (1%)               | 17,355 (1%)               |
| 297: Suicidal ideation or attempt                     | 595 (1%)              | 2,805 (0%)                | 618 (4%)              | 27,048 (2%)               | 146 (1%)              | 24,973 (1%)               |
| 278.1: Obesity                                        | 22,597 (40%)          | 134,552 (11%)             | 2,834 (17%)           | 120,627 (7%)              | 2,546 (14%)           | 98,891 (4%)               |
| 300.12 Agoraphobia, social phobia, and panic disorder | 1,752 (3%)            | 12,763 (1%)               | 330 (2%)              | 13,650 (1%)               | 188 (1%)              | 11,367 (1%)               |
| 317.1: Alcoholism                                     | 1,387 (2%)            | 10,843 (1%)               | 542 (3%)              | 29,753 (2%)               | 444 (2%)              | 31,849 (1%)               |
| 539: Bariatric surgery                                | 3,238 (6%)            | 10,094 (1%)               | 324 (2%)              | 11,116 (1%)               | 256 (1%)              | 8,077 (0%)                |

|                     |            |             |             |             |             |             |
|---------------------|------------|-------------|-------------|-------------|-------------|-------------|
| 532: Dysphagia      | 3,026 (5%) | 17,460 (2%) | 907 (5%)    | 38,595 (2%) | 1,505 (8%)  | 54,845 (2%) |
| 427.9: Palpitations | 4,028 (7%) | 27,386 (2%) | 1,743 (10%) | 58,027 (3%) | 2,085 (11%) | 65,812 (3%) |

Mean age is the average age of the patients defined by the most recent hospital visit in which they received an ICD-9 code. Hospital values reflect all patients with an EHR visit at age 10 or later.

Figure S1

## Case Prevalence by PRS Ventile for Phenome-Wide Significant Phenotypes

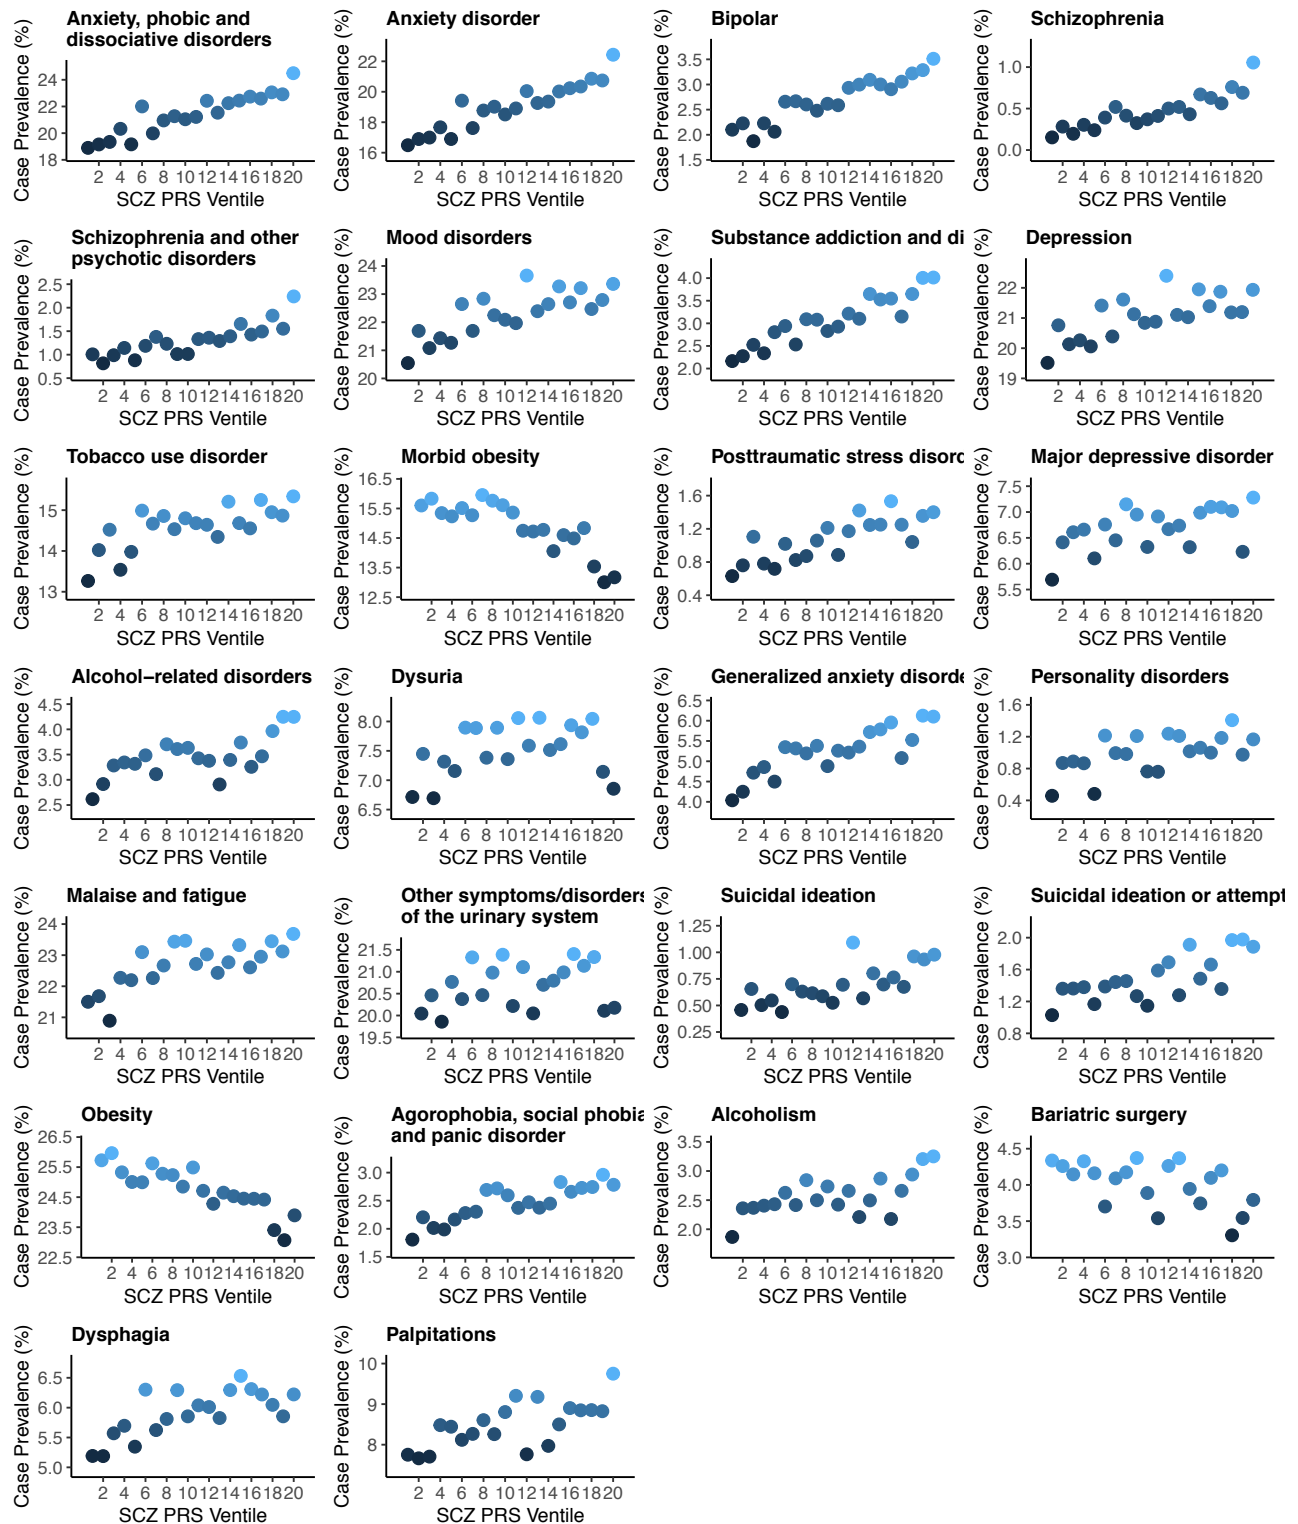



Figure S2.  
Schizophrenia PRS PheWAS Meta-Analysis Conditioned on Schizophrenia Diagnosis

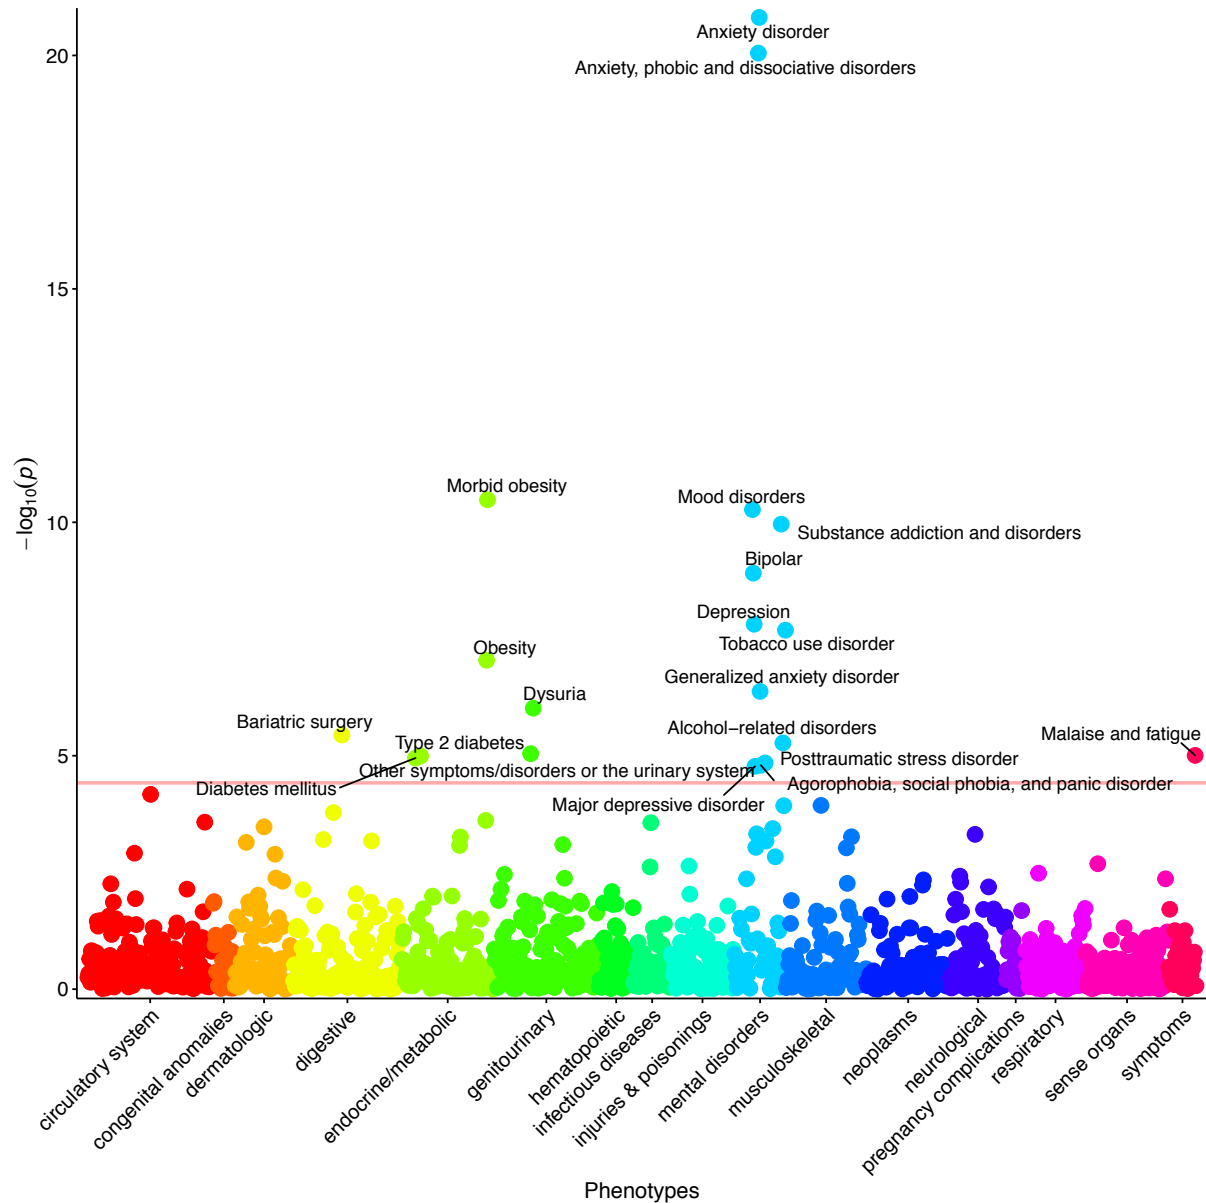

Manhattan plot for phenome-wide association analysis with schizophrenia polygenic risk scores conditioned on psychosis-related diagnoses (phecode 295) meta-analyzed across three healthcare systems (1338 phenotypes; 91,980 patients). The x axis is phenotype (grouped by broad disease category) and the y axis is significance ( $-\log_{10} P$ ; 2-tailed) of association derived by logistic regression including covariates for median age across the medical record, sex, top 10 principal components, and phecode 295. The red line shows phenome-wide level significance ( $3.7 \times 10^{-5}$ ). All significant effects were positive (i.e., higher polygenic risk scores resulted in higher incidence of the phenotype) with five exceptions: morbid obesity, obesity, bariatric surgery, type 2 diabetes, and diabetes mellitus.

## References

1. Ruderfer DM, Walsh CG, Aguirre MW, et al. Significant shared heritability underlies suicide attempt and clinically predicted probability of attempting suicide. *bioRxiv*. 2018. doi:10.1101/266411.
2. The 1000 Genomes Project Consortium. A global reference for human genetic variation. *Nature*. 2015;526(7571):68-74. doi:10.1038/nature15393.
